# Supplementary material for: Temperature during early development has long-term effects on microRNA expression in Atlantic cod
Source: PubMed Central journal article supplement (PMC4403832; doi:10.1186/s12864-015-1503-7), 2015-04-17
Supplement: 12864_2015_1503_MOESM3_ESM.pdf [file 12864_2015_1503_MOESM3_ESM.pdf]

Color Key

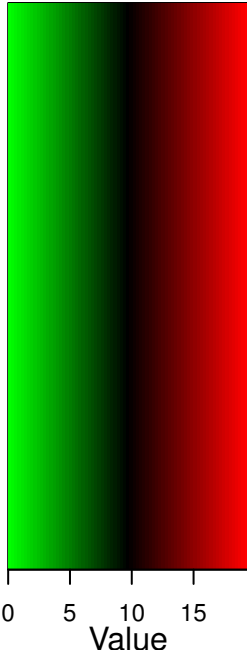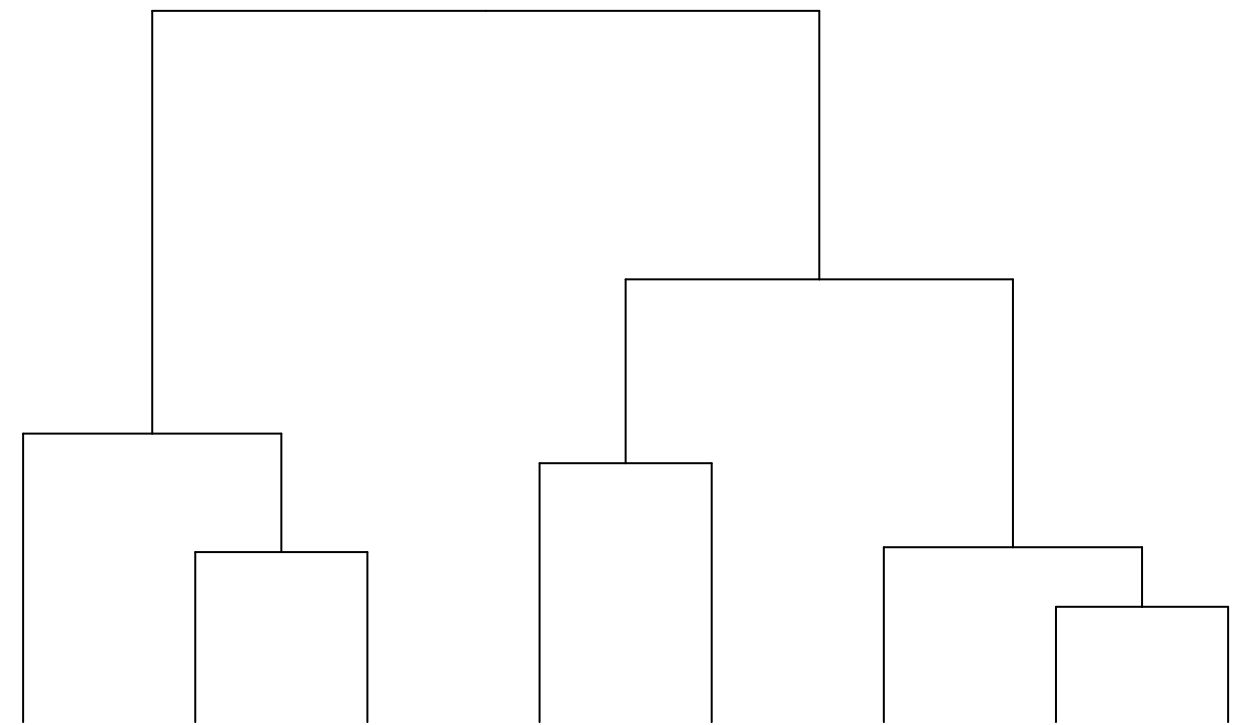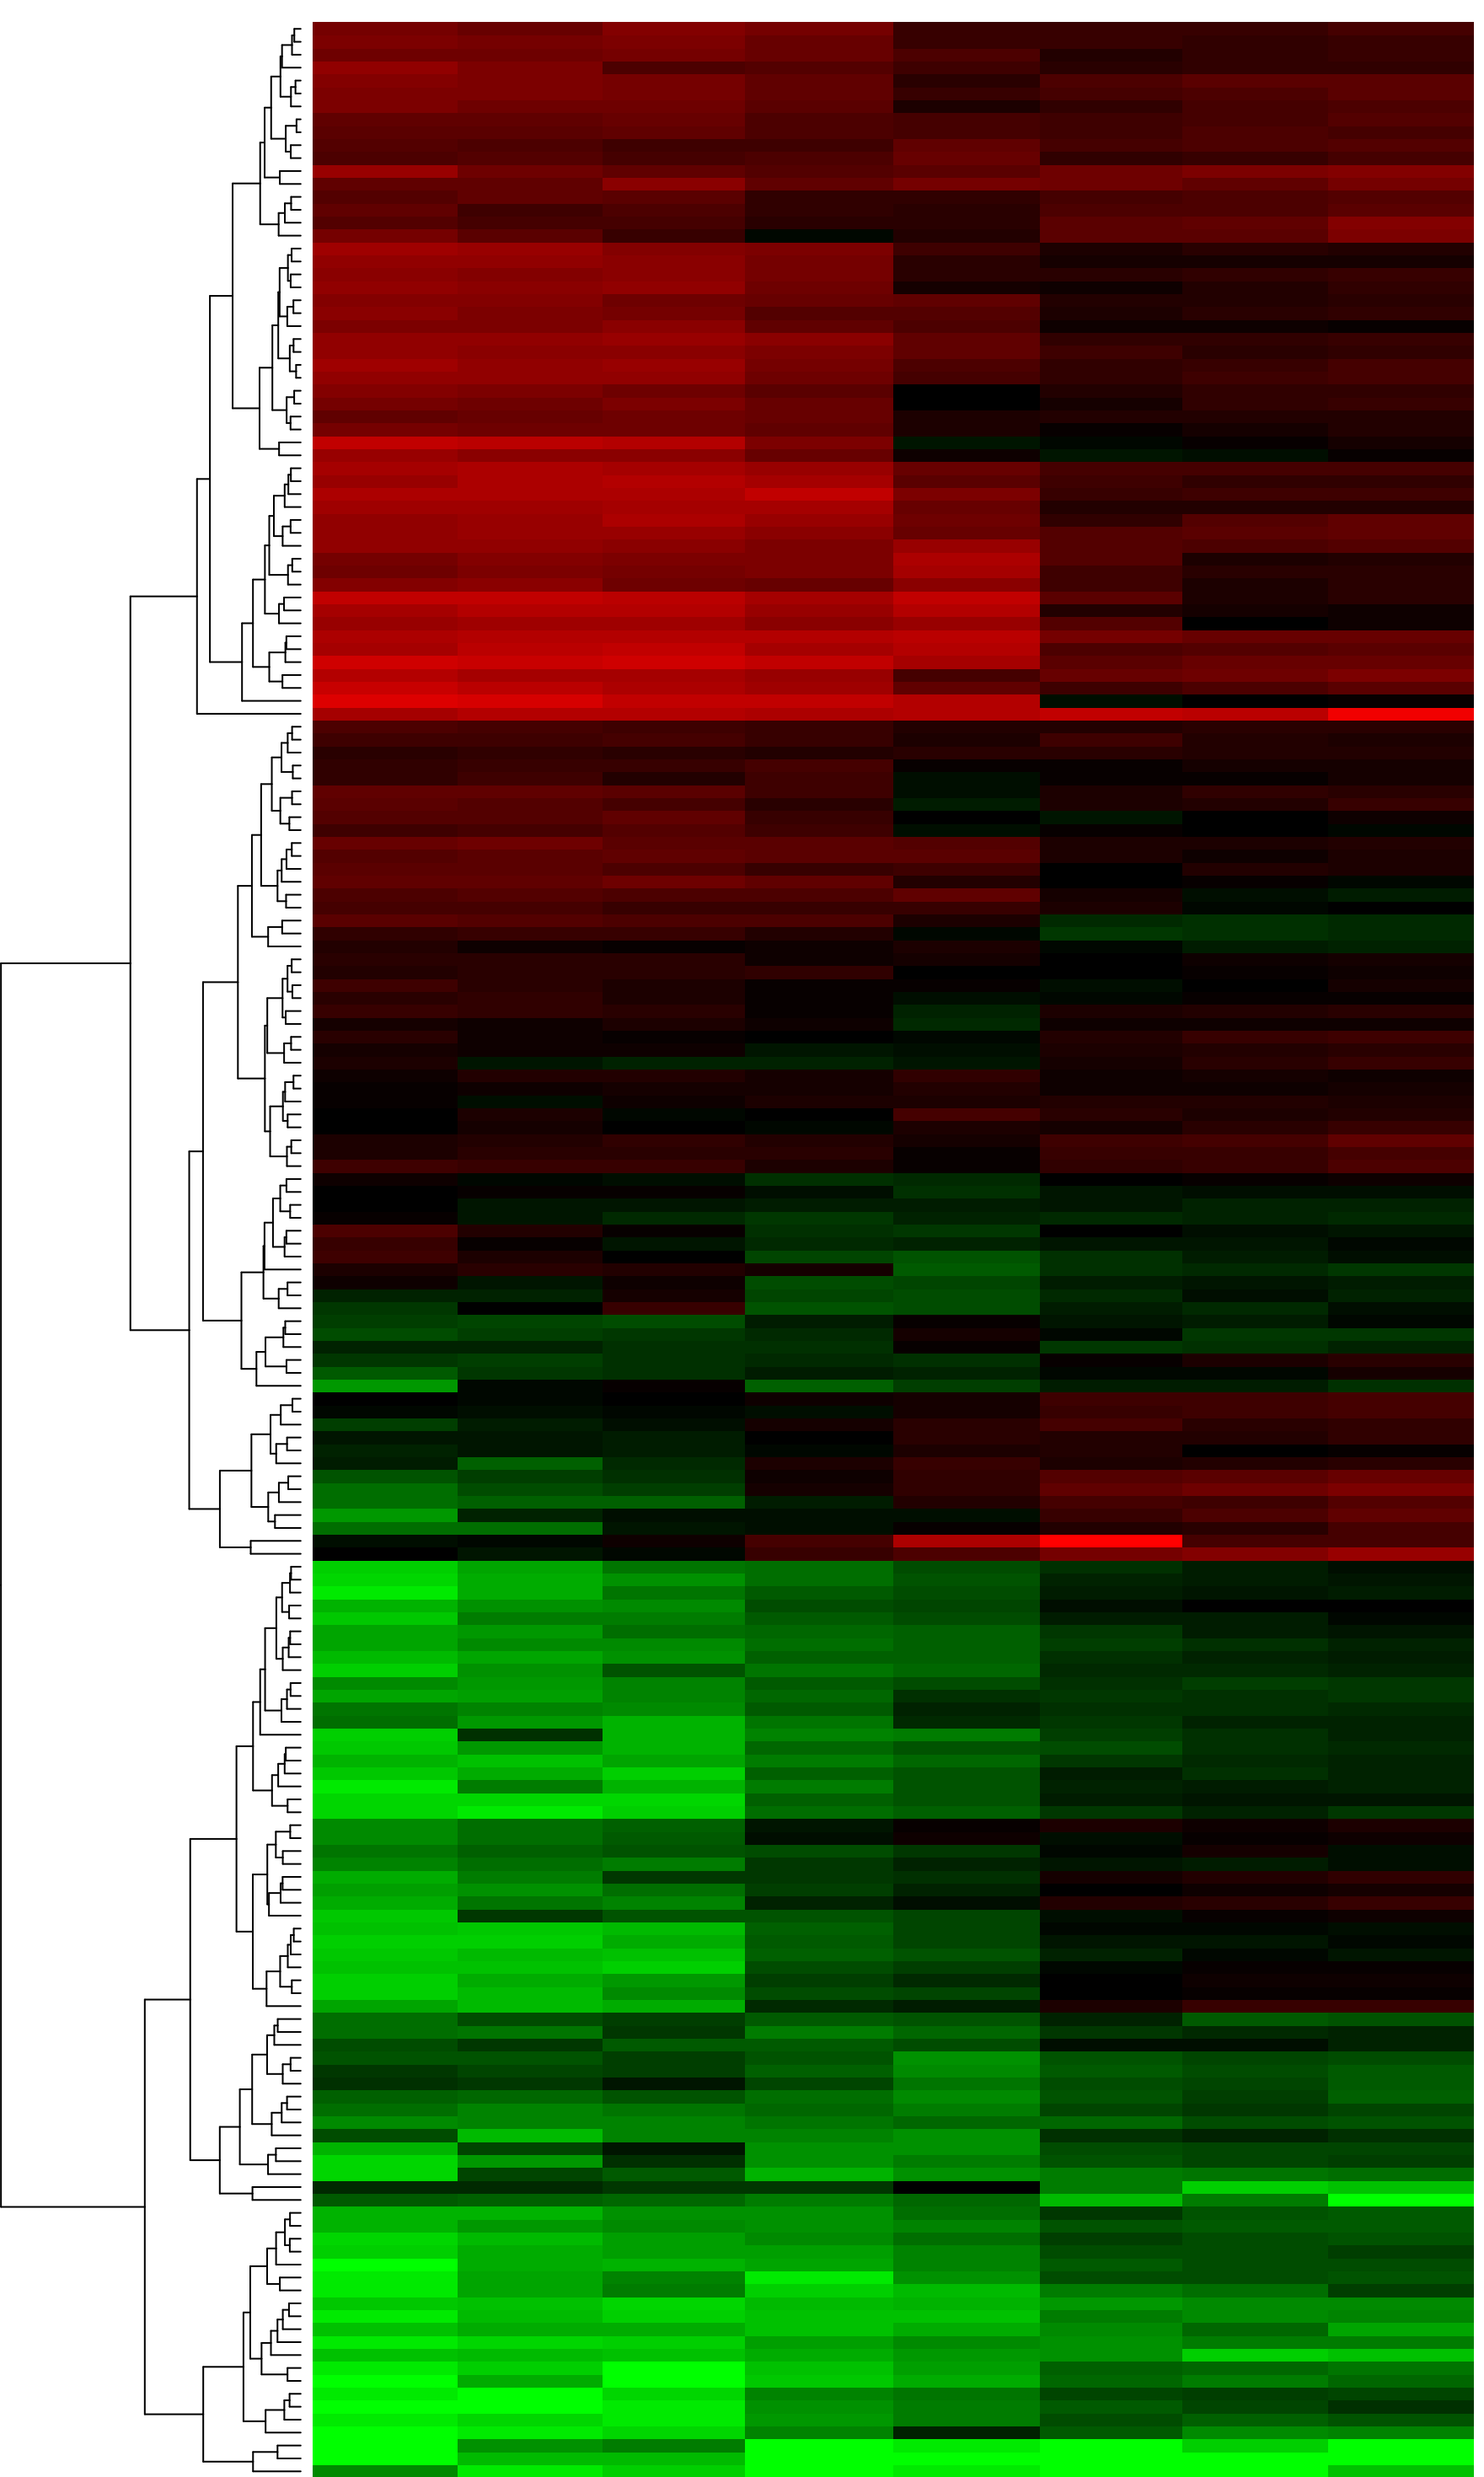

- miR-7
- miR-100
- miR-222
- miR-21
- miR-27
- miR-23
- miR-122
- miR-153
- miR-25
- miR-15
- miR-196
- let-7
- miR-92
- miR-29
- miR-24
- miR-194
- miR-210
- miR-1
- miR-140
- miR-135
- miR-103
- miR-133
- miR-126
- miR-221
- miR-99
- miR-200
- miR-22
- miR-338
- miR-138
- miR-183
- miR-2188
- miR-192
- miR-214
- miR-218
- miR-124
- miR-9
- miR-204
- miR-30
- miR-16
- miR-20
- miR-18
- miR-205
- miR-203
- miR-301
- miR-17
- miR-19
- miR-10
- miR-181
- miR-125
- miR-199
- miR-206
- miR-130
- miR-455
- miR-129
- miR-101
- miR-499
- miR-216
- miR-145
- miR-143
- miR-139
- miR-96
- miR-148
- miR-34
- miR-184
- miR-182
- miR-93
- miR-152
- miR-429
- miR-456
- miR-141
- miR-217
- miR-190
- miR-223
- miR-365
- miR-459
- miR-724
- miR-460
- miR-730
- miR-150
- miR-454
- miR-489
- miR-375
- miR-725
- miR-758
- miR-132
- miR-137
- miR-458
- miR-144
- miR-212
- miR-551
- miR-7132
- miR-146
- miR-462
- miR-451
- miR-723
- miR-731
- miR-2184
- miR-202
- miR-1388
- miR-733
- miR-449
- miR-727
- miR-363
- miR-2192
- miR-187
- miR-142
- miR-219
- miR-193
- miR-7550
- miR-107
- miR-738
- miR-729
- miR-155
- miR-7551
- miR-1306
- miR-430
- miR-7641
- miR-7553
- miR-2191
- miR-7547
- miR-734
- miR-7560
- miR-7791
- miR-2197
- miR-461
- miR-7563
- miR-7793
- miR-2186
- miR-2187
- miR-7572
- miR-7790
- miR-7574
- miR-7796
- miR-2195
- miR-7145
- miR-7789
- miR-7565
- miR-457
- miR-2185
- miR-7146
- miR-2198
- miR-7555
- miR-735
- miR-7147
- miR-7558
- miR-7795
- miR-2196
- miR-7570
- miR-7566
- miR-7571
- miR-7567
- miR-2189
- miR-106
- miR-722
- miR-728
- miR-31
- miR-737
- miR-736
- miR-7552
- miR-7792
- miR-7149
- miR-732
- miR-3906
- miR-740
- miR-33
- miR-2618
- miR-2133
- miR-2193
- miR-7569
- miR-7577
- miR-7559
- miR-147
- miR-2194
- miR-7576
- miR-7573
- miR-7788
- miR-7562
- miR-7568
- miR-7554
- miR-7548
- miR-7564
- miR-7561
- miR-7557
- miR-7594
- miR-7549
- miR-7556
- miR-7148

miRNAs
