# Supplementary material for: Temperature during early development has long-term effects on microRNA expression in Atlantic cod
Source: PubMed Central journal article supplement (PMC4403832; doi:10.1186/s12864-015-1503-7), 2015-04-17
Supplement: 12864_2015_1503_MOESM4_ESM.pdf [file 12864_2015_1503_MOESM4_ESM.pdf]

Color Key

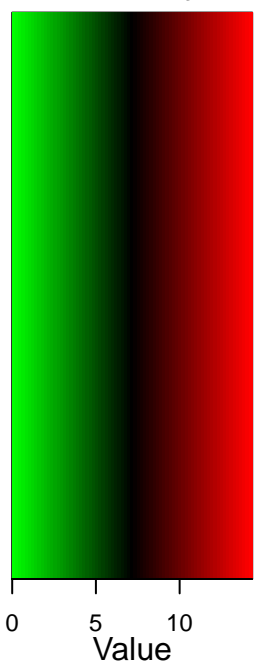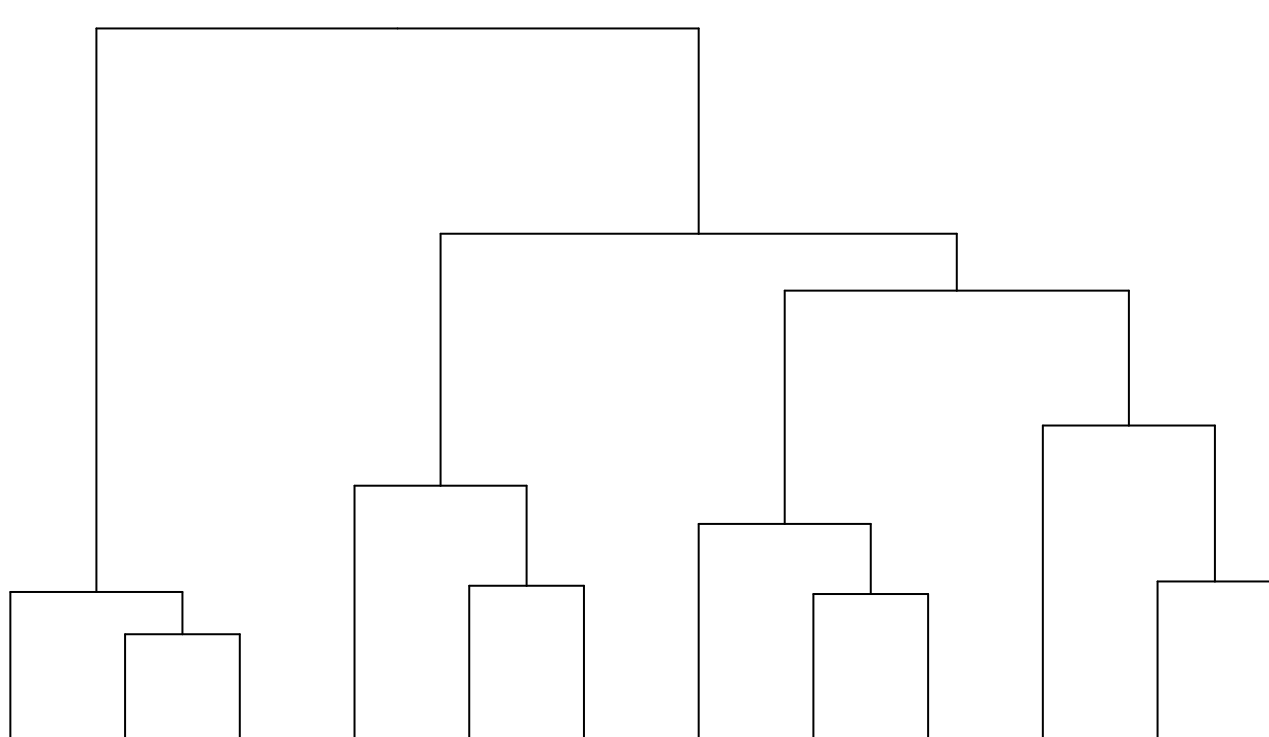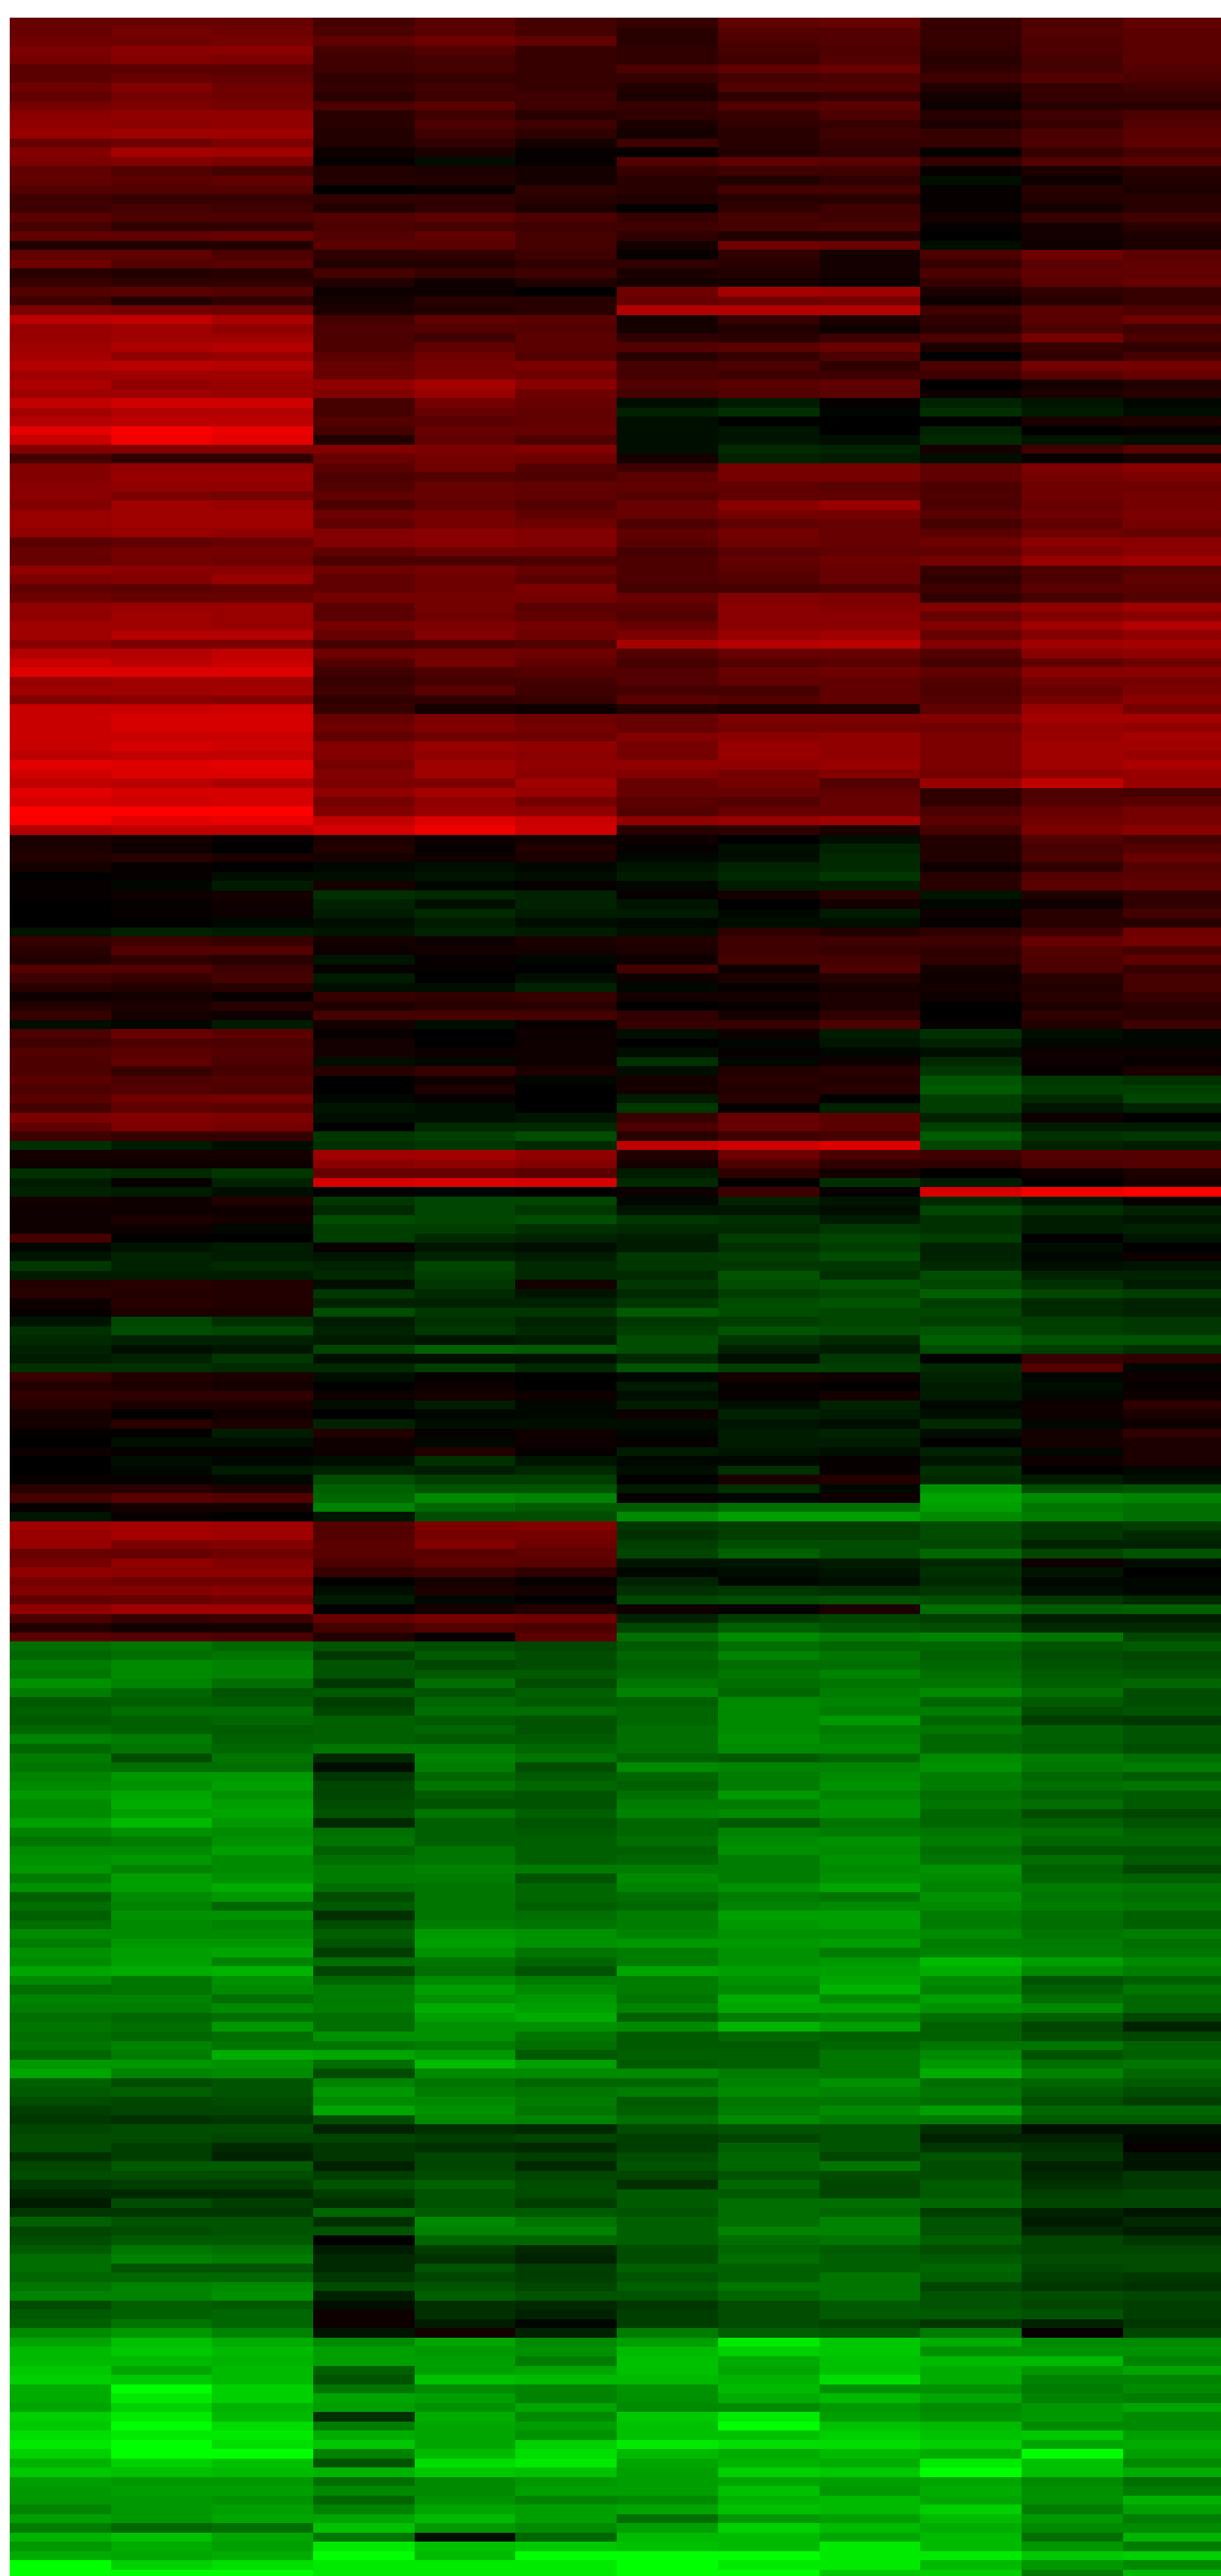

- mir-26b
- mir-30b
- mir-30c
- let-7f-1
- mir-12b
- mir-101b
- mir-395a
- mir-190a
- let-7f-2
- mir-301a
- mir-222a
- mir-181b
- mir-18a
- let-7f-3
- mir-10c
- mir-140
- mir-489
- mir-365
- mir-25
- mir-27a
- mir-92a
- mir-455a
- let-7f-4
- mir-27c
- mir-144
- mir-150
- mir-139b
- mir-107
- mir-143
- mir-214
- mir-145
- mir-221
- mir-28b
- mir-2188
- mir-135c
- mir-204a
- mir-29a
- mir-139
- mir-125a
- mir-218a
- mir-135b
- mir-135a
- mir-138
- mir-9
- mir-124a
- mir-132a
- mir-182
- mir-30c
- mir-20a
- mir-16a
- mir-24a
- mir-19a
- mir-17
- mir-130c
- mir-21
- mir-148
- mir-152
- mir-194
- mir-23b
- let-7f-5
- mir-462
- mir-23a
- mir-210
- mir-30e
- mir-22a
- mir-18b
- mir-199
- let-7f-6
- mir-181a
- mir-338
- let-7f-7
- mir-301c
- mir-543
- mir-54a
- let-7f-8
- mir-126a
- mir-26a
- let-7f-9
- mir-100
- mir-14b
- mir-451
- mir-99
- mir-103
- mir-128
- mir-125b
- mir-7a
- mir-39
- mir-457a
- mir-34c
- mir-755d
- mir-153c
- mir-2198
- mir-19c
- mir-33
- mir-155
- mir-733
- mir-192
- mir-142a
- mir-93
- mir-146a
- mir-203a
- mir-7132
- mir-1388
- mir-7641
- mir-731
- mir-205
- mir-196a
- mir-217
- mir-219
- mir-22b
- mir-137
- mir-27b
- mir-730
- mir-218b
- mir-218c
- mir-216a
- mir-1
- mir-10a
- mir-133a
- mir-202
- mir-200a
- mir-200b
- mir-429a
- mir-375
- mir-122
- mir-18c
- mir-20b
- mir-181c
- mir-454b
- mir-206
- mir-130b
- mir-551
- mir-430a
- mir-184
- mir-130a
- mir-227
- mir-10d
- mir-3618
- mir-125c
- mir-30a
- mir-489
- mir-2187
- mir-1788
- mir-22
- mir-24b
- mir-27e
- mir-27f
- mir-194a
- mir-16c
- mir-454a
- mir-52b
- mir-729
- mir-460
- mir-193a
- mir-725
- mir-2184
- mir-31
- mir-10a
- mir-728
- mir-7552
- mir-153a
- mir-153b
- mir-129a
- mir-212
- mir-137
- mir-187
- mir-456
- mir-458
- mir-224
- mir-723
- mir-183
- mir-98
- mir-449
- mir-430d
- mir-196b
- mir-222b
- mir-363
- mir-7146
- mir-2189
- mir-734
- mir-18b
- mir-15c
- mir-124b
- mir-7b
- mir-457b
- mir-736
- mir-106
- mir-194b
- mir-455b
- mir-766
- mir-2196
- mir-7145
- mir-726
- mir-756d
- mir-7789
- mir-7547
- mir-2553
- mir-7792
- mir-7796
- mir-7790
- mir-7791
- mir-461
- mir-54b
- mir-7665
- mir-732
- mir-203c
- mir-257
- mir-204b
- mir-7558a
- mir-2191
- mir-7558b
- mir-2193
- mir-7653b
- mir-7794
- mir-7653a
- mir-7133
- mir-2192
- mir-740
- mir-7569
- mir-2197
- mir-7672
- mir-430c
- mir-7574
- mir-128b
- mir-301a
- mir-7570
- mir-722
- mir-193b
- mir-2185
- mir-132b
- mir-430b
- mir-203b
- mir-126b
- mir-133c
- mir-203
- mir-2186
- mir-7793
- mir-2196
- mir-459
- mir-767
- mir-7571
- mir-190b
- mir-735
- mir-7795
- mir-7147
- mir-7555
- mir-7551
- mir-141
- mir-7557
- mir-7149
- mir-7663c
- mir-24c
- mir-428b
- mir-133b
- mir-7564
- mir-7554
- mir-2194
- mir-7546
- mir-7559
- mir-7148
- mir-7573
- mir-146b
- mir-142b
- mir-389b
- mir-7561
- mir-147b
- mir-7576
- mir-7562
- mir-28c
- mir-200c
- mir-7568
- mir-196c
- mir-7788
- mir-7549
- mir-196d

B\_HH B\_LH B\_LL P\_LH P\_LL P\_HH G\_HH G\_LH G\_LL L\_LH L\_HH L\_LL

Tissues and treatment groups

miRNAs
