# Supplementary material for: Temperature during early development has long-term effects on microRNA expression in Atlantic cod
Source: PubMed Central journal article supplement (PMC4403832; doi:10.1186/s12864-015-1503-7), 2015-04-17

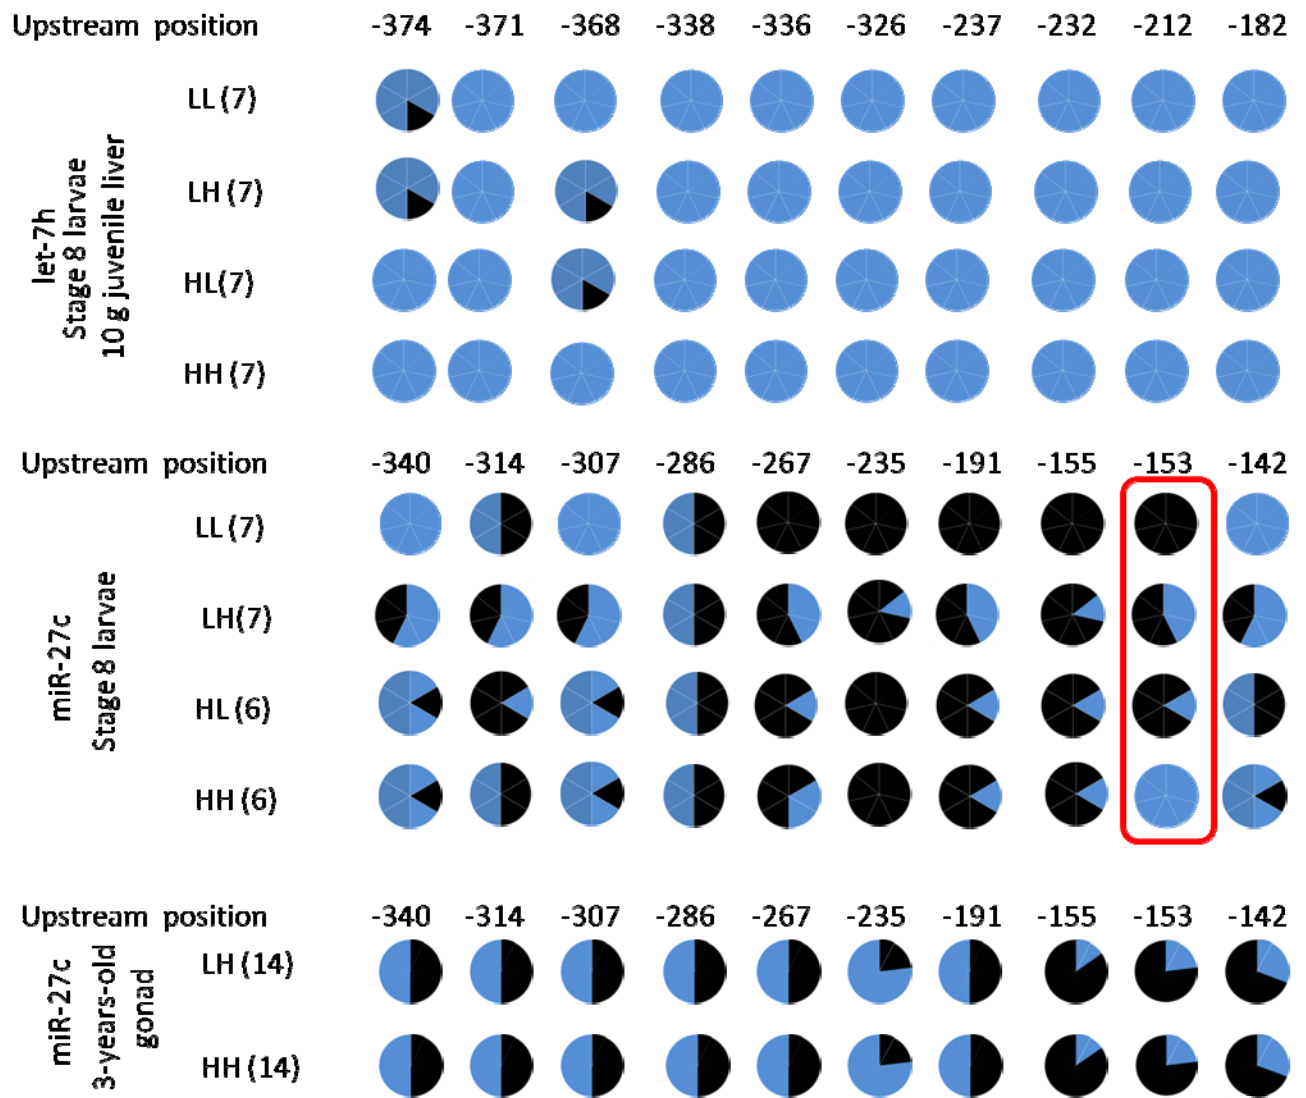

Supplement: 12864_2015_1503_MOESM8_ESM.pdf [file 12864_2015_1503_MOESM8_ESM.pdf]
